# Supplementary material for: Estimating Groundwater Flow Velocity in Shallow Volcanic Aquifers of the Ethiopian Highlands Using a Geospatial Technique
Source: MDPI journal article supplement (doi:10.3390/su151914490), 2023-10-05
Supplement: s1 [file s1]

### Theoretical background for groundwater flow velocity estimation.

The velocity of groundwater at which water is moving through the pore matrix of an aquifer available for flow is known as seepage velocity [46,47]. The pace at which fluid particles flow across the porous medium in a straight line from one place to another [48,49] and the apparent velocity through the porous medium is called the seepage velocity [50]. It is more realistic than Darcy flux, also known as Darcy velocity, in expressing the actual velocity of groundwater within the pores of an aquifer; Darcy flux assumes that the flow occurs throughout the soil, when in reality, the flow is limited to the pore space [51]. The seepage velocity is calculated by dividing the Darcy flux by the effective porosity, as shown in Equation 1 [51].

$$V_{seep} = \frac{v}{n_{eff}} \quad (1)$$

Where  $V_{seep}$  is the seepage velocity (m/d),  $v$  is the Darcy flux ( $m^3/s/m^2$ ), and  $n_{eff}$  is the effective porosity of the aquifer (dimensionless). Darcy velocity is the product of the hydraulic gradient multiplied by the hydraulic conductivity of the aquifer, as in Equation (2)[52]:

$$v = -k \frac{\Delta h}{\Delta s} \quad (2)$$

where  $k$  is the hydraulic conductivity (m/s),  $\Delta h$  is the difference in the hydraulic head (m), and  $\Delta s$  is the distance (m). The hydraulic conductivity can be written in terms of transmissivity and the saturated thickness of the aquifer, as in Equation (3)[46,52]:

$$k = \frac{T}{b} \quad (3)$$

where  $T$  is the transmissivity ( $m^2/d$ ) and  $b$  is the saturated thickness of the aquifer (m). Equation (3) is useful in groundwater hydraulics; most of the wells' hydraulic calculations and equations are written in terms of transmissivity rather than the hydraulic conductivity [46,52]. Combining Equations (1)–(3), the seepage velocity can be written as Equation (4):

$$V_{seep} = -\frac{T}{bn_{eff}} \frac{\Delta h}{\Delta s} \quad (4)$$

Therefore, Equation (4) was used accordingly as a model in ArcMap/GIS and as a mapping framework to calculate the seepage velocity of the aquifers.

Table S1: Water wells history, hydraulic parameters and calculated effective porosity

| Sample ID | X      | Y      | SWL   | BH Depth | Saturated thickness (b) | T(m2/day)             | Specific capacity (Sc) | Initial effective porosity | Effective porosity |
|-----------|--------|--------|-------|----------|-------------------------|-----------------------|------------------------|----------------------------|--------------------|
| EAE01     | 337698 | 926445 | 21.39 | 70.3     | 48.91                   | $2.45 \times 10^1$    | 0.87                   | 0.03415                    | 0.14935            |
| EAE02     | 338942 | 923746 | 12.59 | 44.86    | 32.27                   | $3.21 \times 10^1$    | 1.896                  | 0.35604                    | 0.15928            |
| EAE03     | 341178 | 924774 | 53.02 | 76       | 22.98                   | $1.37 \times 10^3$    | 331.26                 | 0.91148                    | 0.24399            |
| EAE04     | 340757 | 924251 | 49.17 | 60.78    | 11.61                   | $7.05 \times 10^0$    | 6.59                   | 0.33067                    | 0.17654            |
| EAE07     | 344663 | 921508 | 24.2  | 43.5     | 19.3                    | $3.88 \times 10^2$    | 534.19                 | 0.94009                    | 0.25381            |
| EAE08     | 344821 | 920280 | 20.52 | 47.13    | 26.61                   | $6.13 \times 10^{-1}$ | 0.099                  | 0.16406                    | 0.12481            |
| EAE10     | 348666 | 919456 | 62.16 | 84.3     | 22.14                   | $1.12 \times 10^2$    | 42.6                   | 0.64057                    | 0.20597            |
| EAE11     | 350964 | 918909 | 11.17 | 51.45    | 40.28                   | $6.24 \times 10^{-1}$ | 0.94                   | 0.32279                    | 0.15031            |
| EAE12     | 353085 | 916542 | 23.41 | 76.7     | 53.29                   | $9.33 \times 10^{-1}$ | 1.41                   | 0.40014                    | 0.15543            |
| EAE13     | 349869 | 916553 | 60.08 | 73.66    | 13.58                   | $9.50 \times 10^{-2}$ | 0.325                  | 0.27182                    | 0.13769            |
| EAE14     | 349548 | 914882 | 58.08 | 76.88    | 18.8                    | $5.33 \times 10^3$    | 845.547                | 0.99558                    | 0.26363            |
| EAE19     | 368834 | 915079 | 24.45 | 63.69    | 39.24                   | $2.66 \times 10^0$    | 3.78                   | 0.45598                    | 0.16862            |
| EEJ02     | 429740 | 984856 | 8.17  | 49.5     | 41.33                   | $7.18 \times 10^1$    | 38.59                  | 0.74581                    | 0.20429            |
| EEJ06     | 433310 | 996719 | 14.92 | 62.66    | 47.74                   | $3.84 \times 10^0$    | 5.43                   | 0.44992                    | 0.17374            |

|       |        |         |       |       |        |                       |         |         |         |
|-------|--------|---------|-------|-------|--------|-----------------------|---------|---------|---------|
| EEJ09 | 425021 | 986568  | 5.94  | 35.6  | 29.66  | 1.34×10 <sup>1</sup>  | 11.48   | 0.53468 | 0.18482 |
| EEJ10 | 427230 | 996599  | 7.23  | 46.88 | 39.65  | 4.81×10 <sup>2</sup>  | 265.49  | 0.98967 | 0.23957 |
| EEJ16 | 432590 | 1012878 | 14.92 | 62.66 | 47.74  | 1.65×10 <sup>0</sup>  | 3.07    | 0.46527 | 0.16575 |
| EEJ17 | 437268 | 1005326 | 29.49 | 47.35 | 17.86  | 1.81×10 <sup>1</sup>  | 21.57   | 0.51993 | 0.19471 |
| EEJ20 | 427230 | 993936  | 32.82 | 53.39 | 20.57  | 1.17×10 <sup>0</sup>  | 1.72    | 0.29018 | 0.158   |
| EME01 | 297887 | 1263242 | 10.32 | 21.75 | 11.43  | 8.35×10 <sup>-1</sup> | 777     | 0.88655 | 0.26179 |
| EME02 | 293507 | 1268379 | 11.02 | 26    | 14.98  | 1.19×10 <sup>3</sup>  | 1190.48 | 0.99599 | 0.27118 |
| EME03 | 295781 | 1255382 | 17.61 | 53.26 | 35.65  | 2.52×10 <sup>1</sup>  | 9.59    | 0.54584 | 0.1821  |
| EME05 | 298208 | 1257600 | 10.05 | 49    | 38.95  | 1.61×10 <sup>3</sup>  | 8.4     | 0.54579 | 0.18012 |
| EME07 | 295075 | 1256183 | 2.42  | 61.34 | 58.92  | 7.35×10 <sup>0</sup>  | 26.66   | 0.76629 | 0.19814 |
| EME08 | 297599 | 1252650 | 16.37 | 49.02 | 32.65  | 1.61×10 <sup>3</sup>  | 23.08   | 0.63647 | 0.1958  |
| EME09 | 295613 | 1260950 | 6.67  | 51.4  | 44.73  | 1.50×10 <sup>2</sup>  | 71.35   | 0.8406  | 0.21493 |
| EME12 | 304882 | 1251109 | 4.96  | 42.5  | 37.54  | 6.37×10 <sup>0</sup>  | 25.58   | 0.67533 | 0.19747 |
| EME13 | 289477 | 1268665 | 23.06 | 50    | 26.94  | 2.74×10 <sup>1</sup>  | 1764.71 | 1.16469 | 0.28014 |
| EME15 | 296417 | 1259982 | 11.38 | 50.3  | 38.92  | 2.67×10 <sup>2</sup>  | 1.96    | 0.38614 | 0.15972 |
| EME18 | 305841 | 1257066 | 9.01  | 55.4  | 46.39  | 2.35×10 <sup>1</sup>  | 25.21   | 0.71345 | 0.19723 |
| ESD01 | 444972 | 905278  | 10.35 | 25.3  | 14.95  | 1.39×10 <sup>2</sup>  | 55.83   | 0.6017  | 0.21062 |
| ESD03 | 413694 | 971609  | 19.09 | 38.05 | 18.955 | 3.96×10 <sup>2</sup>  | 163.04  | 0.78153 | 0.23011 |
| ESD04 | 440487 | 909637  | 21.48 | 68.6  | 47.12  | 9.07×10 <sup>-1</sup> | 1.52    | 0.38923 | 0.1564  |
| ESD08 | 448194 | 904739  | 40.7  | 62    | 21.3   | 4.04×10 <sup>0</sup>  | 2.19    | 0.31386 | 0.16119 |
| ESD09 | 446896 | 904608  | 12.99 | 35.71 | 22.72  | 3.60×10 <sup>1</sup>  | 20.24   | 0.55486 | 0.19369 |
| ESD10 | 447561 | 904656  | 23.79 | 51.5  | 27.71  | 1.22×10 <sup>0</sup>  | 1.68    | 0.32471 | 0.15769 |
| ESD11 | 448698 | 896983  | 20.37 | 42.94 | 22.57  | 6.23×10 <sup>1</sup>  | 30.91   | 0.60457 | 0.20058 |
| ESD13 | 449212 | 913788  | 15.01 | 18.6  | 3.59   | 3.65×10 <sup>0</sup>  | 17.36   | 0.26838 | 0.19125 |
| ESD16 | 443281 | 909888  | 22.3  | 43.5  | 21.2   | 2.58×10 <sup>0</sup>  | 2.46    | 0.32313 | 0.16274 |
| ESD17 | 449596 | 928315  | 38.9  | 47    | 8.1    | 5.98×10 <sup>1</sup>  | 45.02   | 0.46946 | 0.20691 |
| ESD19 | 448348 | 907059  | 52    | 80    | 28     | 2.63×10 <sup>2</sup>  | 158.23  | 0.85329 | 0.22955 |
| ESD20 | 448033 | 914224  | 41    | 75    | 34     | 1.72×10 <sup>0</sup>  | 2.49    | 0.38988 | 0.1629  |
